# Supplementary material
Source: Elsevier journal article supplement (http://library.osu.edu/projects/msa/suppmat/v260.i2.pp130-134/mmc1.pdf)
Supplement: mmc1 [file mmc1.pdf]

# **SUPPLEMENTARY ONLINE MATERIAL**

Table 1: The wavenumbers (in  $\text{cm}^{-1}$ ) of the 0-0, 1-1 and 1-2 bands of the  $C^1\Sigma^+ - X^1\Sigma^+$  system of AlH.

| $J$        | $R_{11ee}(J)$ | $o - c^a$ | $P_{11ee}(J)$ | $o - c^a$ | $R_{11ee}(J)$ | $o - c^b$ | $P_{11ee}(J)$ | $o - c^b$ |
|------------|---------------|-----------|---------------|-----------|---------------|-----------|---------------|-----------|
| 0 - 0 band |               |           |               |           |               |           |               |           |
| 0          | 44610.482     | 0.000     |               |           | 44610.482     | -0.002    |               |           |
| 1          | 44623.427     | 0.001     | 44585.107     | 0.000     | 44623.427     | 0.002     | 44585.107     | -0.002    |
| 2          | 44636.510     | 0.001     | 44572.692     | 0.000     | 44636.510     | 0.003     | 44572.692     | -0.001    |
| 3          | 44649.712     | 0.002     | 44560.469     | -0.001    | 44649.712     | -0.006    | 44560.469     | 0.003     |
| 4          | 44663.031     | 0.002     | 44548.432     | -0.001    | 44663.031     | 0.004     | 44548.432     | 0.002     |
| 5          | 44676.414     | 0.001     | 44536.572     | -0.002    | 44676.414     | 0.004     | 44536.572     | -0.009    |
| 6          | 44689.836     | 0.002     | 44524.908     | -0.002    | 44689.836     | 0.004     | 44524.908     | -0.002    |
| 7          | 44703.264     | 0.006     | 44513.408     | -0.001    | 44703.264     | 0.009     | 44513.408     | 0.002     |
| 8          | 44716.630     | 0.002     | 44502.056     | -0.002    | 44716.630     | -0.004    | 44502.056     | -0.001    |
| 9          | 44729.917     | 0.001     | 44490.832     | -0.006    | 44729.917     | -0.006    | 44490.832     | -0.004    |
| 10         | 44743.072     | 0.003     | 44479.711     | -0.003    | 44743.072     | 0.005     | 44479.711     | -0.009    |
| 11         | 44756.027     | 0.002     | 44468.668     | -0.001    | 44756.027     | 0.021     | 44468.668     | -0.008    |
| 12         | 44768.676     | 0.003     | 44457.667     | -0.003    | 44768.676     | 0.003     | 44457.667     | -0.002    |
| 13         | 44780.988     | 0.004     | 44446.668     | -0.002    | 44780.988     | -0.003    | 44446.668     | 0.017     |
| 14         | 44792.877     | 0.005     | 44435.570     | -0.003    | 44792.877     | 0.002     | 44435.570     | -0.005    |
| 15         | 44804.224     | 0.008     | 44424.365     | -0.004    | 44804.224     | -0.006    | 44424.365     | -0.011    |
| 16         | 44814.972     | 0.012     | 44412.980     | -0.005    | 44814.972     | 0.025     | 44412.980     | -0.009    |
| 17         | 44824.887     | 0.000     | 44401.308     | -0.008    | 44824.887     | -0.017    | 44401.308     | -0.022    |
| 18         | 44833.975     | 0.000     | 44389.309     | -0.012    | 44833.975     | 0.014     | 44389.309     | 0.003     |
| 19         | 44841.833     | 0.004     | * 44376.838   | 0.025     | # 44841.833   | -0.128    | * 44376.838   | 0.025     |
| 20         | 44848.727     | 0.009     | 44363.736     | 0.000     | 44848.727     | 0.004     | 44363.736     | 0.014     |
| 21         | 44854.325     | 0.000     | 44349.754     | -0.004    | # 44854.325   | 0.284     | # 44349.754   | -0.136    |
| 22         | 44855.604     | 0.012     | 44335.136     | -0.009    | # 44855.604   | -2.075    | 44335.136     | -0.014    |
| 23         | * 44858.500   | 0.063     | * 44319.645   | 0.052     | # 44858.500   | -0.867    | # 44319.645   | 0.336     |
| 24         | * 44857.900   | -0.041    | 44300.046     | -0.012    | # 44857.900   | -0.896    | # 44300.046   | -2.099    |
| 25         | 44855.001     | 0.002     | 44282.471     | 0.000     | # 44855.001   | -0.611    | # 44282.471   | -0.930    |
| 26         | 44849.370     | -0.005    | 44261.923     | 0.000     | # 44849.370   | -0.038    | # 44261.923   | -0.855    |
| 27         | 44839.714     | -0.008    | 44239.321     | -0.002    | 44839.714     | -0.008    | # 44239.321   | -0.614    |
| 28         |               |           | 44214.450     | 0.005     |               |           | # 44214.450   | -0.028    |
| 29         |               |           | 44185.961     | 0.008     |               |           | 44185.961     | 0.008     |
| 1 - 1 band |               |           |               |           |               |           |               |           |
| 0          | 44308.627     | -0.001    |               |           | 44308.627     | -0.004    |               |           |
| 1          | * 44319.645   | -0.037    | 44284.744     | 0.000     | * 44319.645   | -0.037    | 44284.744     | 0.004     |
| 2          | 44330.083     | -0.002    | 44271.938     | 0.001     | 44330.083     | -0.002    | 44271.938     | -0.002    |
| 3          | 44339.770     | 0.000     | 44258.559     | 0.000     | 44339.770     | -0.001    | 44258.559     | -0.001    |
| 4          | 44348.030     | -0.015    | 44244.576     | 0.002     | # 44348.030   | -0.627    | 44244.576     | 0.004     |
| 5          | 44361.851     | -0.003    | 44229.930     | 0.000     | # 44361.851   | 5.210     | 44229.930     | -0.001    |
| 6          | 44366.513     | -0.001    | 44213.968     | 0.015     | # 44366.513   | 2.912     | # 44213.968   | -0.597    |
| 7          | 44372.583     | -0.011    | 44203.608     | 0.003     | # 44372.583   | 3.186     | # 44203.608   | 5.216     |
| 8          | * 44376.838   | -0.102    | 44184.219     | 0.001     | # 44376.838   | 2.970     | # 44184.219   | 2.913     |
| 9          |               |           | 44166.390     | 0.011     |               |           | # 44166.390   | 3.207     |
| 10         |               |           | 44146.951     | 0.000     |               |           | # 44146.951   | 3.071     |
| 1 - 2 band |               |           |               |           |               |           |               |           |
| 0          | 42739.514     | 0.000     |               |           | 42739.514     | 0.023     |               |           |
| 1          | 42750.918     | 0.009     | 42715.940     | 0.000     | 42750.918     | 0.016     | 42715.940     | -0.022    |
| 2          | 42762.007     | -0.006    |               |           | 42762.007     | -0.016    |               |           |
| 3          | 42772.804     | 0.007     | 42691.575     | -0.009    | 42772.804     | 0.010     | 42691.575     | -0.003    |
| 4          | 42782.505     | 0.008     | 42679.023     | 0.006     | # 42782.505   | -0.627    | 42679.023     | -0.005    |
| 5          | 42798.102     | -0.003    | 42666.183     | -0.007    | # 42798.102   | 5.163     | 42666.183     | -0.004    |
| 6          | 42804.914     | 0.000     | 42652.345     | -0.008    | # 42804.914   | 2.815     | # 42652.345   | -0.644    |
| 7          |               |           | 42644.521     | 0.003     |               |           | # 42644.521   | 5.169     |
| 8          | 42820.694     | -0.011    | 42627.992     | 0.000     | # 42820.694   | 2.777     | # 42627.992   | 2.815     |
| 9          |               |           | 42613.267     | 0.000     |               |           | # 42613.267   | 2.922     |
| 10         |               |           | 42597.517     | 0.011     |               |           | # 42597.517   | 2.799     |

The columns labelled  $o - c$  show observed minus calculated values of Curl-Dane-Watson method fit (<sup>a</sup>) and Hamiltonian fit (<sup>b</sup>).  
\* Indicates low accuracy lines not included in the fit.  
# Indicates perturbed lines not included in the Hamiltonian fit.
